# Supplementary material
Source: PubMed Central journal article supplement (PMC6941988)
Supplement: NIHMS1545664-supplement-3.pdf [file NIHMS1545664-supplement-3.pdf]

**A** ASAP2f L143G S144T **F148X H151X** R415Q -ΔF/F (%)

|   | A          | C          | D          | E          | F          | G          | H                 | I          | K          | L          | M          | N          | P          | Q          | R          | S          | T          | V          | W          | Y          | aa151 |
|---|------------|------------|------------|------------|------------|------------|-------------------|------------|------------|------------|------------|------------|------------|------------|------------|------------|------------|------------|------------|------------|-------|
| A | 18.2 ± 3.9 | 14.6 ± 1.6 | 18.6 ± 3.0 | 19.6 ± 3.4 | 18.2 ± 2.6 | 16.1 ± 3.2 | 19.0 ± 2.3        | 15.1 ± 0.8 | 19.2 ± 6.4 | 16.4 ± 1.6 | 17.7 ± 2.2 | 17.0 ± 1.1 | 15.4 ± 4.3 | 17.1 ± 1.6 | 18.1 ± 1.8 | 16.2 ± 1.2 | 16.6 ± 1.1 | 18.1 ± 3.8 | 18.6 ± 5.5 | 18.1 ± 3.4 |       |
| C | 15.8 ± 4.1 | 12.6 ± n/a | 12.9 ± n/a | 16.2 ± 2.6 | 13.8 ± n/a | 14.4 ± 1.5 | 16.4 ± n/a        | 18.9 ± n/a | 16.1 ± n/a | 15.1 ± n/a | 15.4 ± n/a | 14.4 ± n/a | 13.8 ± 2.5 | 18.5 ± n/a | n/a        | 13.5 ± n/a | 12.7 ± n/a | 16.8 ± 4.3 | 12.4 ± n/a | 15.4 ± n/a |       |
| D | 13.0 ± 1.3 | 15.1 ± 3.5 | 17.4 ± 6.8 | 20.5 ± 3.5 | 18.1 ± 4.2 | 16.6 ± 1.2 | 17.8 ± 3.3        | 21.1 ± 0.1 | 17.8 ± 2.0 | 17.6 ± 0.4 | 17.0 ± 1.9 | 18.5 ± 4.3 | 17.8 ± 4.6 | 20.4 ± 7.1 | 18.0 ± 3.3 | 16.2 ± 4.4 | 14.9 ± 8.7 | 18.3 ± 2.1 | 17.6 ± 2.3 | 14.8 ± 2.3 |       |
| E | 16.7 ± 1.1 | 20.2 ± 1.3 | 17.5 ± 3.1 | 20.0 ± 5.3 | 18.3 ± 3.4 | 17.0 ± 0.2 | 19.3 ± 2.2        | 18.8 ± 2.6 | 17.1 ± 0.7 | 20.0 ± 0.3 | 17.3 ± 4.7 | 19.2 ± 1.4 | 17.9 ± 1.3 | 18.9 ± 4.2 | 17.4 ± 5.1 | 14.9 ± 7.2 | 15.5 ± 5.2 | 20.2 ± 1.3 | 14.1 ± 3.7 | 19.4 ± 2.5 |       |
| F | n/a        | 12.6 ± n/a | 21.3 ± 2.5 | 23.0 ± 1.8 | 17.3 ± 4.5 | 18.1 ± n/a | <u>22.4 ± 2.8</u> | 13.0 ± n/a | 22.1 ± 2.2 | n/a        | 22.5 ± n/a | 17.3 ± 4.4 | 15.0 ± n/a | 21.5 ± 2.5 | 17.9 ± 0.8 | 19.9 ± 1.8 | 17.1 ± 5.5 | 17.4 ± n/a | 21.7 ± 3.6 | 21.4 ± 2.7 |       |
| G | 16.6 ± 2.5 | 14.9 ± 4.6 | 20.0 ± 3.9 | 18.2 ± 2.9 | 18.8 ± 3.6 | 13.3 ± 1.3 | 18.4 ± 2.8        | 21.2 ± 3.1 | 18.3 ± 2.4 | 17.7 ± 3.2 | 18.6 ± 2.1 | 18.4 ± 4.3 | 16.3 ± 3.0 | 13.6 ± 0.0 | 16.7 ± 2.9 | 18.4 ± 3.8 | 17.6 ± 1.5 | 18.2 ± 6.1 | 18.3 ± 3.6 | 17.2 ± 1.9 |       |
| H | 17.9 ± 3.4 | 15.7 ± 2.7 | 20.8 ± 4.0 | 17.6 ± 1.0 | 18.6 ± 3.3 | 17.0 ± 3.4 | 21.1 ± 2.9        | 21.5 ± 4.1 | 18.5 ± 2.1 | 20.2 ± 3.2 | 17.8 ± 1.3 | 15.1 ± 2.4 | 18.5 ± 0.9 | 16.8 ± 3.9 | 16.9 ± 1.4 | 18.4 ± 4.4 | 13.9 ± 4.9 | 20.3 ± 0.6 | 20.1 ± 4.3 | 18.9 ± 5.8 |       |
| I | 16.5 ± 3.2 | 18.0 ± 1.5 | 22.5 ± 5.5 | 18.5 ± 1.9 | 20.2 ± 1.7 | 16.2 ± 1.5 | 17.1 ± 9.2        | 19.5 ± 2.6 | 19.9 ± 2.0 | 19.2 ± 2.9 | 16.8 ± 0.4 | 17.5 ± 1.8 | 17.5 ± 1.7 | 17.2 ± 1.4 | 18.7 ± 6.2 | 16.7 ± 2.8 | 15.4 ± 4.8 | 17.4 ± 1.3 | 18.6 ± 2.3 | 19.6 ± 3.5 |       |
| K | 17.3 ± 4.7 | 19.3 ± 2.0 | 18.4 ± 3.9 | 22.5 ± 2.7 | 16.7 ± 4.6 | 16.6 ± 1.6 | 19.4 ± 1.1        | 19.1 ± 1.9 | 17.4 ± 4.4 | 21.8 ± 4.7 | 20.6 ± 1.2 | 20.0 ± 3.3 | 16.5 ± 2.1 | 16.7 ± 3.8 | 17.8 ± 2.5 | 18.4 ± 2.2 | 16.0 ± 2.4 | 18.0 ± 2.6 | 20.7 ± 2.7 | 17.0 ± 2.2 |       |
| L | 18.5 ± 2.0 | 14.1 ± 1.5 | 21.5 ± 4.2 | 22.5 ± 1.3 | 16.0 ± 3.7 | 17.7 ± 2.9 | 15.4 ± 2.5        | 17.6 ± 4.4 | 18.1 ± 3.5 | 21.5 ± 3.5 | 18.1 ± 3.7 | 14.7 ± 2.0 | 17.4 ± 0.6 | 17.9 ± 3.7 | 16.9 ± 2.1 | 21.7 ± 2.9 | 12.6 ± 3.6 | 16.9 ± 2.0 | 18.6 ± 2.4 | 11.5 ± 0.1 |       |
| M | 16.6 ± 2.6 | 13.3 ± 3.5 | 17.2 ± 3.5 | 18.8 ± 5.7 | 17.5 ± 1.8 | 15.9 ± 3.8 | 18.8 ± 0.2        | 21.2 ± 3.1 | 22.0 ± 1.2 | 22.9 ± 0.8 | 19.5 ± 2.2 | 18.1 ± 2.4 | 14.4 ± 0.9 | 19.3 ± 3.2 | 15.9 ± 3.0 | 17.2 ± 1.8 | 13.9 ± 1.4 | 17.6 ± 3.2 | 20.5 ± 5.6 | 18.4 ± 5.4 |       |
| N | 18.2 ± n/a | 16.3 ± n/a | 21.0 ± 1.1 | 18.2 ± 2.0 | 17.0 ± 5.1 | 18.9 ± 5.4 | 22.9 ± n/a        | 21.9 ± n/a | 17.3 ± 4.5 | 18.9 ± 5.9 | 19.5 ± 3.6 | 18.0 ± 3.4 | n/a        | 16.8 ± 3.2 | 17.7 ± 0.8 | 16.8 ± 3.5 | 16.6 ± 5.5 | 25.6 ± n/a | 19.0 ± 2.2 | 20.0 ± n/a |       |
| P | 16.2 ± 3.8 | 18.7 ± 0.3 | 19.2 ± 3.9 | 19.6 ± 2.9 | 16.4 ± 2.3 | 9.2 ± 7.3  | 17.9 ± 2.9        | 18.0 ± 4.4 | 15.9 ± 3.2 | 17.9 ± 1.8 | 18.4 ± 2.3 | 17.5 ± 2.8 | 16.4 ± 3.6 | 17.2 ± 0.2 | 18.3 ± 3.0 | 15.7 ± 5.3 | 17.4 ± 1.6 | 16.9 ± 3.5 | 18.6 ± 4.4 |            |       |
| Q | 14.9 ± 1.3 | 15.6 ± 2.2 | 19.0 ± n/a | 17.5 ± 4.3 | 16.4 ± 1.1 | 15.8 ± 0.9 | 16.8 ± n/a        | 13.9 ± 2.3 | 17.7 ± 2.3 | 15.5 ± 1.9 | 16.1 ± 3.4 | 17.4 ± n/a | 16.0 ± 1.1 | 17.8 ± 1.5 | 19.2 ± n/a | 17.0 ± 1.3 | 14.9 ± n/a | 16.9 ± 0.7 | 16.7 ± 2.7 | 14.8 ± n/a |       |
| R | 18.8 ± 5.8 | 18.8 ± 2.5 | 21.2 ± 5.2 | 21.7 ± 2.5 | 16.2 ± 2.4 | 15.9 ± 2.0 | 17.9 ± 2.0        | 13.9 ± 1.7 | 16.4 ± 4.5 | 19.3 ± 1.1 | 16.7 ± 2.6 | 19.3 ± 3.7 | 14.9 ± 3.2 | 15.6 ± 4.9 | 17.8 ± 2.0 | 16.4 ± 4.5 | 18.7 ± 1.0 | 18.4 ± 3.2 | 19.1 ± 1.0 | 16.5 ± 1.5 |       |
| S | 14.8 ± 3.9 | 15.3 ± 4.0 | 20.1 ± 3.5 | 17.0 ± 6.6 | 16.9 ± 4.5 | 17.4 ± 5.1 | 17.0 ± 4.2        | 18.4 ± 2.9 | 12.0 ± 1.2 | 15.6 ± 4.2 | 15.5 ± 2.5 | 15.6 ± 5.4 | 14.8 ± 3.1 | 21.0 ± 5.4 | 14.4 ± 2.2 | 14.1 ± 5.7 | 16.1 ± 5.2 | 19.1 ± 1.2 | 19.2 ± 1.0 | 15.5 ± 4.7 |       |
| T | 17.3 ± 2.8 | 19.0 ± 3.0 | 25.3 ± 1.8 | 24.5 ± 1.8 | 21.6 ± 1.2 | 19.5 ± n/a | 23.6 ± 1.3        | 21.5 ± 3.9 | 20.7 ± 2.9 | 19.6 ± 2.0 | 21.1 ± 1.3 | 19.1 ± 6.2 | 22.9 ± 2.2 | 20.0 ± 2.5 | 21.1 ± 3.5 | 17.2 ± n/a | 18.6 ± 0.2 | 22.9 ± 2.0 | 22.3 ± 0.9 |            |       |
| V | 16.0 ± 3.3 | 13.7 ± 3.6 | 20.0 ± 1.3 | 20.4 ± 4.4 | 14.0 ± 2.6 | 20.1 ± 0.6 | 17.3 ± 4.6        | 18.7 ± 0.9 | 18.2 ± 2.2 | 18.8 ± 2.3 | 17.5 ± 2.4 | 16.1 ± 0.7 | 15.5 ± 0.8 | 15.9 ± 4.7 | 17.1 ± 0.8 | 17.6 ± 1.9 | 17.3 ± 1.0 | 18.0 ± 4.2 | 15.9 ± 4.5 | 16.0 ± 2.4 |       |
| W | 16.3 ± 1.3 | 16.8 ± 1.2 | 18.6 ± 1.5 | 18.4 ± 1.5 | 15.0 ± 3.1 | 16.7 ± 2.5 | 13.3 ± 2.6        | 19.7 ± 1.0 | 19.1 ± 2.5 | 15.9 ± 1.4 | 17.6 ± 1.2 | 15.4 ± 2.5 | 15.4 ± 0.5 | 13.9 ± n/a | 16.9 ± 0.8 | 18.5 ± 2.0 | 17.0 ± 2.0 | 19.2 ± 4.5 | 17.9 ± 1.2 | 16.8 ± 3.1 |       |
| Y | 15.3 ± 3.4 | 14.6 ± 2.6 | 20.2 ± 1.2 | 20.2 ± 0.1 | 14.8 ± 1.5 | 17.3 ± 2.0 | 16.6 ± 3.7        | 18.8 ± 4.3 | 18.7 ± 2.8 | 18.5 ± 1.1 | 14.0 ± 1.1 | 18.0 ± 3.9 | 16.1 ± 1.3 | 16.4 ± 1.4 | 16.7 ± 4.9 | 19.2 ± 3.6 | 15.6 ± 1.1 | 18.7 ± 1.6 | 15.5 ± 0.1 | 15.0 ± 3.4 |       |

aa148

**B** ASAP2f L143G S144T **F148X H151X** R415Q -t<sub>1/2</sub> (ms)

|   | A          | C          | D          | E          | F          | G          | H                 | I          | K          | L          | M          | N          | P          | Q          | R          | S           | T          | V           | W          | Y          | aa151 |
|---|------------|------------|------------|------------|------------|------------|-------------------|------------|------------|------------|------------|------------|------------|------------|------------|-------------|------------|-------------|------------|------------|-------|
| A | 24.3 ± 1.5 | 19.3 ± 4.5 | 16.3 ± 2.5 | 18.3 ± 4.5 | 16.7 ± 2.9 | 18.0 ± 5.2 | 19.3 ± 3.1        | 20.5 ± 0.7 | 18.5 ± 0.7 | 17.7 ± 2.5 | 17.0 ± 1.7 | 22.5 ± 0.7 | 20.0 ± 5.2 | 16.7 ± 1.5 | 20.0 ± 4.6 | 19.7 ± 6.1  | 18.3 ± 3.2 | 18.7 ± 3.2  | 20.0 ± 4.2 | 20.0 ± 6.1 |       |
| C | 24.7 ± 2.1 | 19.0 ± n/a | 22.0 ± n/a | 18.7 ± 4.6 | 15.0 ± n/a | 20.0 ± 2.8 | 15.0 ± n/a        | 14.0 ± n/a | 19.0 ± n/a | 12.0 ± n/a | 22.0 ± n/a | 15.0 ± n/a | 17.3 ± 3.5 | 17.0 ± n/a | n/a        | 16.0 ± n/a  | 19.0 ± n/a | 17.7 ± 3.1  | 20.0 ± n/a | 24.0 ± n/a |       |
| D | 20.0 ± 1.4 | 19.0 ± 4.2 | 19.7 ± 4.9 | 22.0 ± 0.0 | 19.0 ± 2.6 | 20.0 ± 2.6 | 22.7 ± 8.0        | 18.7 ± 3.5 | 18.0 ± 1.4 | 17.5 ± 3.5 | 19.0 ± 1.4 | 23.3 ± 4.0 | 17.0 ± 2.6 | 17.0 ± 1.4 | 20.0 ± 7.9 | 18.0 ± 2.8  | 22.5 ± 2.1 | 18.0 ± 1.7  | 25.0 ± 5.0 | 16.3 ± 0.6 |       |
| E | 17.5 ± 0.7 | 20.0 ± 3.5 | 17.3 ± 4.0 | 15.0 ± 0.0 | 18.7 ± 4.7 | 14.0 ± 0.0 | 20.3 ± 2.5        | 22.5 ± 2.1 | 19.0 ± 1.4 | 17.0 ± 2.6 | 15.5 ± 0.7 | 20.5 ± 2.1 | 18.7 ± 3.1 | 20.0 ± 0.0 | 23.0 ± 0.0 | 14.7 ± 11.8 | 18.3 ± 2.9 | 21.3 ± 2.9  | 22.3 ± 5.9 | 21.0 ± 5.0 |       |
| F | n/a        | 30.0 ± n/a | 16.3 ± 4.0 | 16.7 ± 4.6 | 20.0 ± 3.6 | 15.0 ± n/a | <u>24.0 ± 3.6</u> | 21.0 ± n/a | 22.3 ± 1.5 | n/a        | 20.0 ± n/a | 23.3 ± 0.7 | 15.0 ± n/a | 18.5 ± 2.1 | 22.0 ± 1.0 | 21.0 ± 4.2  | 17.7 ± 3.1 | 18.0 ± n/a  | 19.0 ± 5.2 | 19.7 ± 2.1 |       |
| G | 22.0 ± 3.0 | 17.7 ± 5.0 | 22.3 ± 6.5 | 20.3 ± 4.6 | 21.3 ± 3.2 | 16.7 ± 0.6 | 20.3 ± 2.5        | 19.0 ± 3.5 | 17.3 ± 4.9 | 19.0 ± 2.6 | 20.0 ± 1.0 | 23.5 ± 4.7 | 14.7 ± 3.2 | 20.0 ± 1.4 | 21.7 ± 5.0 | 20.0 ± 2.0  | 20.7 ± 3.8 | 18.3 ± 4.0  | 19.3 ± 4.9 | 16.0 ± 2.8 |       |
| H | 20.0 ± 2.8 | 18.7 ± 1.5 | 18.0 ± 5.6 | 19.3 ± 0.6 | 21.0 ± 3.0 | 17.0 ± 2.6 | 20.0 ± 2.8        | 19.0 ± 3.0 | 21.0 ± 1.0 | 19.7 ± 2.5 | 20.0 ± 3.0 | 26.3 ± 1.2 | 18.3 ± 2.5 | 17.5 ± 2.1 | 23.3 ± 6.5 | 17.7 ± 3.1  | 22.7 ± 2.3 | 15.0 ± 12.2 | 17.0 ± 1.4 | 21.0 ± 5.3 |       |
| I | 23.3 ± 4.0 | 21.5 ± 0.7 | 22.3 ± 3.8 | 21.7 ± 5.5 | 19.3 ± 1.5 | 19.3 ± 4.5 | 20.5 ± 4.9        | 18.7 ± 2.9 | 19.0 ± 3.0 | 19.0 ± 3.5 | 17.7 ± 3.1 | 20.0 ± 1.4 | 15.0 ± 2.8 | 18.7 ± 2.1 | 20.7 ± 5.0 | 17.7 ± 2.5  | 20.3 ± 5.9 | 18.5 ± 4.9  | 22.7 ± 4.5 | 21.3 ± 4.5 |       |
| K | 18.0 ± 1.0 | 18.7 ± 2.1 | 22.7 ± 0.6 | 20.0 ± 5.7 | 20.0 ± 3.0 | 19.7 ± 1.5 | 17.3 ± 3.2        | 21.7 ± 6.7 | 19.7 ± 1.2 | 19.7 ± 4.7 | 19.7 ± 2.5 | 21.0 ± 1.7 | 22.0 ± 0.0 | 22.5 ± 0.7 | 21.0 ± 2.6 | 19.3 ± 3.1  | 21.0 ± 4.2 | 18.0 ± 5.3  | 20.0 ± 4.0 | 19.0 ± 1.4 |       |
| L | 21.3 ± 4.7 | 26.3 ± 7.6 | 19.0 ± 1.7 | 15.7 ± 2.1 | 17.3 ± 3.1 | 23.0 ± 2.0 | 22.3 ± 3.2        | 19.7 ± 3.1 | 20.7 ± 4.7 | 17.3 ± 1.5 | 20.0 ± 3.6 | 24.3 ± 8.4 | 16.0 ± 3.0 | 18.0 ± 4.6 | 18.7 ± 2.3 | 23.0 ± 1.0  | 15.0 ± 1.7 | 20.7 ± 5.1  | 20.0 ± 5.2 | 20.5 ± 7.8 |       |
| M | 22.0 ± 1.7 | 16.7 ± 1.5 | 16.0 ± 2.6 | 17.5 ± 0.7 | 20.7 ± 5.7 | 16.7 ± 3.5 | 18.0 ± 2.8        | 16.5 ± 0.7 | 18.7 ± 2.1 | 19.7 ± 6.0 | 20.7 ± 5.7 | 19.0 ± 6.1 | 19.3 ± 2.9 | 20.3 ± 1.5 | 20.7 ± 3.5 | 19.3 ± 3.2  | 19.7 ± 2.9 | 18.7 ± 3.5  | 15.0 ± 0.0 | 20.0 ± 3.6 |       |
| N | 20.0 ± n/a | 20.0 ± n/a | 21.0 ± 3.6 | 21.7 ± 1.5 | 19.8 ± 4.5 | 18.8 ± 4.8 | 19.0 ± n/a        | 21.0 ± n/a | 16.3 ± 2.1 | 20.8 ± 1.7 | 19.8 ± 8.5 | 20.7 ± 2.1 | n/a        | 18.3 ± 1.2 | 20.0 ± 4.4 | 22.0 ± 3.0  | 18.5 ± 3.5 | 23.0 ± n/a  | 19.0 ± 4.5 | 15.0 ± n/a |       |
| P | 25.0 ± 3.5 | 19.7 ± 3.5 | 21.7 ± 5.7 | 22.0 ± 0.0 | 21.3 ± 5.0 | 17.0 ± 1.4 | 17.0 ± 0.0        | 20.3 ± 1.2 | 15.5 ± 0.7 | 16.7 ± 4.0 | 18.7 ± 3.5 | 17.0 ± 1.4 | 19.7 ± 2.5 | 23.2 ± 3.2 | 24.3 ± 6.7 | 21.7 ± 5.7  | 18.3 ± 1.5 | 18.7 ± 2.3  | 18.7 ± 1.5 | 21.3 ± 3.8 |       |
| Q | 27.3 ± 3.5 | 17.0 ± 6.0 | 16.0 ± n/a | 20.5 ± 7.1 | 19.3 ± 3.1 | 22.3 ± 2.5 | 16.0 ± n/a        | 20.0 ± 1.7 | 20.0 ± 1.4 | 20.3 ± 5.0 | 22.7 ± 1.5 | 25.0 ± n/a | 19.0 ± 5.3 | 16.8 ± 2.5 | 16.0 ± n/a | 20.3 ± 4.6  | 18.0 ± n/a | 20.7 ± 1.2  | 18.0 ± 1.8 | 24.0 ± n/a |       |
| R | 19.0 ± 7.1 | 25.7 ± 0.6 | 17.0 ± 2.8 | 17.3 ± 3.5 | 21.0 ± 2.6 | 23.3 ± 4.0 | 23.3 ± 3.5        | 18.0 ± 2.6 | 21.5 ± 2.1 | 18.3 ± 4.2 | 18.3 ± 3.5 | 18.7 ± 3.8 | 23.3 ± 4.0 | 17.3 ± 0.6 | 18.7 ± 3.1 | 23.0 ± 2.8  | 23.0 ± 7.5 | 19.0 ± 2.6  | 18.7 ± 1.2 | 21.3 ± 2.5 |       |
| S | 20.0 ± 4.0 | 19.3 ± 1.5 | 18.0 ± 4.2 | 17.5 ± 0.7 | 24.0 ± 1.4 | 18.0 ± 2.6 | 19.0 ± 2.8        | 19.7 ± 2.5 | 21.5 ± 4.9 | 19.0 ± 3.0 | 17.0 ± 2.0 | 18.0 ± 1.4 | 18.3 ± 3.8 | 17.0 ± 1.4 | 19.0 ± 0.0 | 22.0 ± 3.0  | 18.5 ± 0.7 | 19.0 ± 1.4  | 15.5 ± 2.1 | 21.5 ± 3.5 |       |
| T | 19.0 ± 0.0 | 18.3 ± 0.6 | 18.7 ± 3.2 | 17.3 ± 2.5 | 15.7 ± 3.8 | 16.0 ± n/a | 19.0 ± 1.7        | 19.7 ± 4.2 | 19.0 ± 1.7 | 15.0 ± 0.0 | 17.7 ± 1.2 | 20.3 ± 7.6 | 23.0 ± 5.3 | 20.7 ± 2.5 | 19.7 ± 1.2 | 18.0 ± 2.6  | 22 ± n/a   | 17.0 ± 2.8  | 19.0 ± 1.0 | 18.0 ± 3.6 |       |
| V | 24.0 ± 5.6 | 19.0 ± 5.6 | 18.7 ± 2.3 | 19.7 ± 2.9 | 20.3 ± 6.7 | 17.7 ± 2.3 | 16.3 ± 3.2        | 21.0 ± 3.6 | 20.3 ± 2.1 | 22.7 ± 5.7 | 18.0 ± 2.0 | 23.3 ± 4.0 | 18.3 ± 6.7 | 17.3 ± 2.1 | 20.5 ± 0.7 |             |            |             |            |            |       |
