# Supplementary material
Source: PubMed Central journal article supplement (PMC6941988)
Supplement: NIHMS1545664-supplement-10.pdf [file NIHMS1545664-supplement-10.pdf]

**Table S1. Kinetics of ASAP-family GEVIs following transmembrane voltage steps. Related to Table 1.**

|                                                                | ASAP1      | ASAP2s     | ASAP2f R414Q | ASAP3       | ASAP3-Kv   |
|----------------------------------------------------------------|------------|------------|--------------|-------------|------------|
| <i>Depolarization (–80 to +20 mV) at 33°C</i>                  |            |            |              |             |            |
| $\tau_{fast}$ (ms)                                             | ND         | 1.5 ± 0.1  | ND           | 0.94 ± 0.06 | ND         |
| $\tau_{slow}$ (ms)                                             | ND         | 7.8 ± 1.1  | ND           | 7.2 ± 1.5   | ND         |
| % fast                                                         | ND         | 67 ± 2     | ND           | 72 ± 1      | ND         |
| <i>Return from 1-ms depolarization (+20 to –80 mV) at 33°C</i> |            |            |              |             |            |
| $\tau_{fast}$ (ms)                                             | ND         | 2.1 ± 0.4  | ND           | 1.5 ± 0.1   | ND         |
| $\tau_{slow}$ (ms)                                             | ND         | 7.1 ± 1.6  | ND           | 6.3 ± 0.4   | ND         |
| % fast                                                         | ND         | 53 ± 10    | ND           | 60 ± 3      | ND         |
| <i>Depolarization (–70 to +30 mV) at 23°C</i>                  |            |            |              |             |            |
| $\tau_{fast}$ (ms)                                             | 2.4 ± 0.2  | 7.0 ± 0.1  | 8.4 ± 0.2    | 3.7 ± 0.1   | 2.6 ± 0.2  |
| $\tau_{slow}$ (ms)                                             | 72 ± 2     | 79 ± 4     | 78 ± 3       | 48 ± 4      | 26 ± 3     |
| % fast                                                         | 70 ± 3     | 77 ± 3     | 79 ± 3       | 81 ± 1      | 76 ± 1     |
| <i>Return from depolarization (+30 to –70 mV) at 23°C</i>      |            |            |              |             |            |
| $\tau_{fast}$ (ms)                                             | 2.1 ± 0.4  | 16.7 ± 0.6 | 16.2 ± 0.8   | 16.0 ± 0.3  | 22.6 ± 0.6 |
| $\tau_{slow}$ (ms)                                             | 75 ± 2     | 116 ± 11   | 115 ± 9      | 102 ± 2     | 93 ± 13    |
| % fast                                                         | 53 ± 5     | 65 ± 4     | 74 ± 4       | 81 ± 1      | 84 ± 3     |
| <i>Hyperpolarization (–70 to –100 mV) at 23°C</i>              |            |            |              |             |            |
| $\tau_{fast}$ (ms)                                             | 10.5 ± 1.0 | 13.8 ± 2.0 | 12.7 ± 1.5   | 6.8 ± 0.2   | 9.0 ± 0.4  |
| $\tau_{slow}$ (ms)                                             | 78 ± 2     | 88 ± 11    | 74 ± 2       | 96 ± 2      | 79 ± 2     |
| % fast                                                         | 40 ± 3     | 49 ± 2     | 40 ± 2       | 61 ± 1      | 59 ± 0.2   |
| <i>Return from hyperpolarization (–100 to –70 mV) at 23°C</i>  |            |            |              |             |            |
| $\tau_{fast}$ (ms)                                             | 7.0 ± 0.2  | 12.6 ± 2.0 | 11.8 ± 1.5   | 5.2 ± 0.3   | 5.4 ± 0.2  |
| $\tau_{slow}$ (ms)                                             | 77 ± 2     | 110 ± 22   | 85 ± 4       | 93 ± 5      | 69 ± 2     |
| % fast                                                         | 50 ± 3     | 54 ± 2     | 53 ± 2       | 67 ± 1      | 66 ± 1     |
| <i>Return from 1-ms depolarization (+20 to –80 mV) at 33°C</i> |            |            |              |             |            |
| $\tau_{fast}$ (ms)                                             | ND         | 2.1 ± 0.4  | ND           | 1.5 ± 0.1   | ND         |
| $\tau_{slow}$ (ms)                                             | ND         | 7.1 ± 1.6  | ND           | 6.3 ± 0.4   | ND         |
| % fast                                                         | ND         | 53 ± 10    | ND           | 60 ± 3      | ND         |

Kinetics were measured in response to 500-ms voltage steps unless otherwise indicated. Values at 23°C are mean ± SEM from 4 (ASAP1), 4 (ASAP2f 414Q), 9 (ASAP2s), 12 (ASAP3), or 6 (ASAP3-Kv) HEK293 cells. Values at 33°C are mean ± SEM from 7 (ASAP2s) or 16 (ASAP3) CHO cells. ND, not determined.
