# Supplementary material
Source: PubMed Central journal article supplement (PMC6941988)

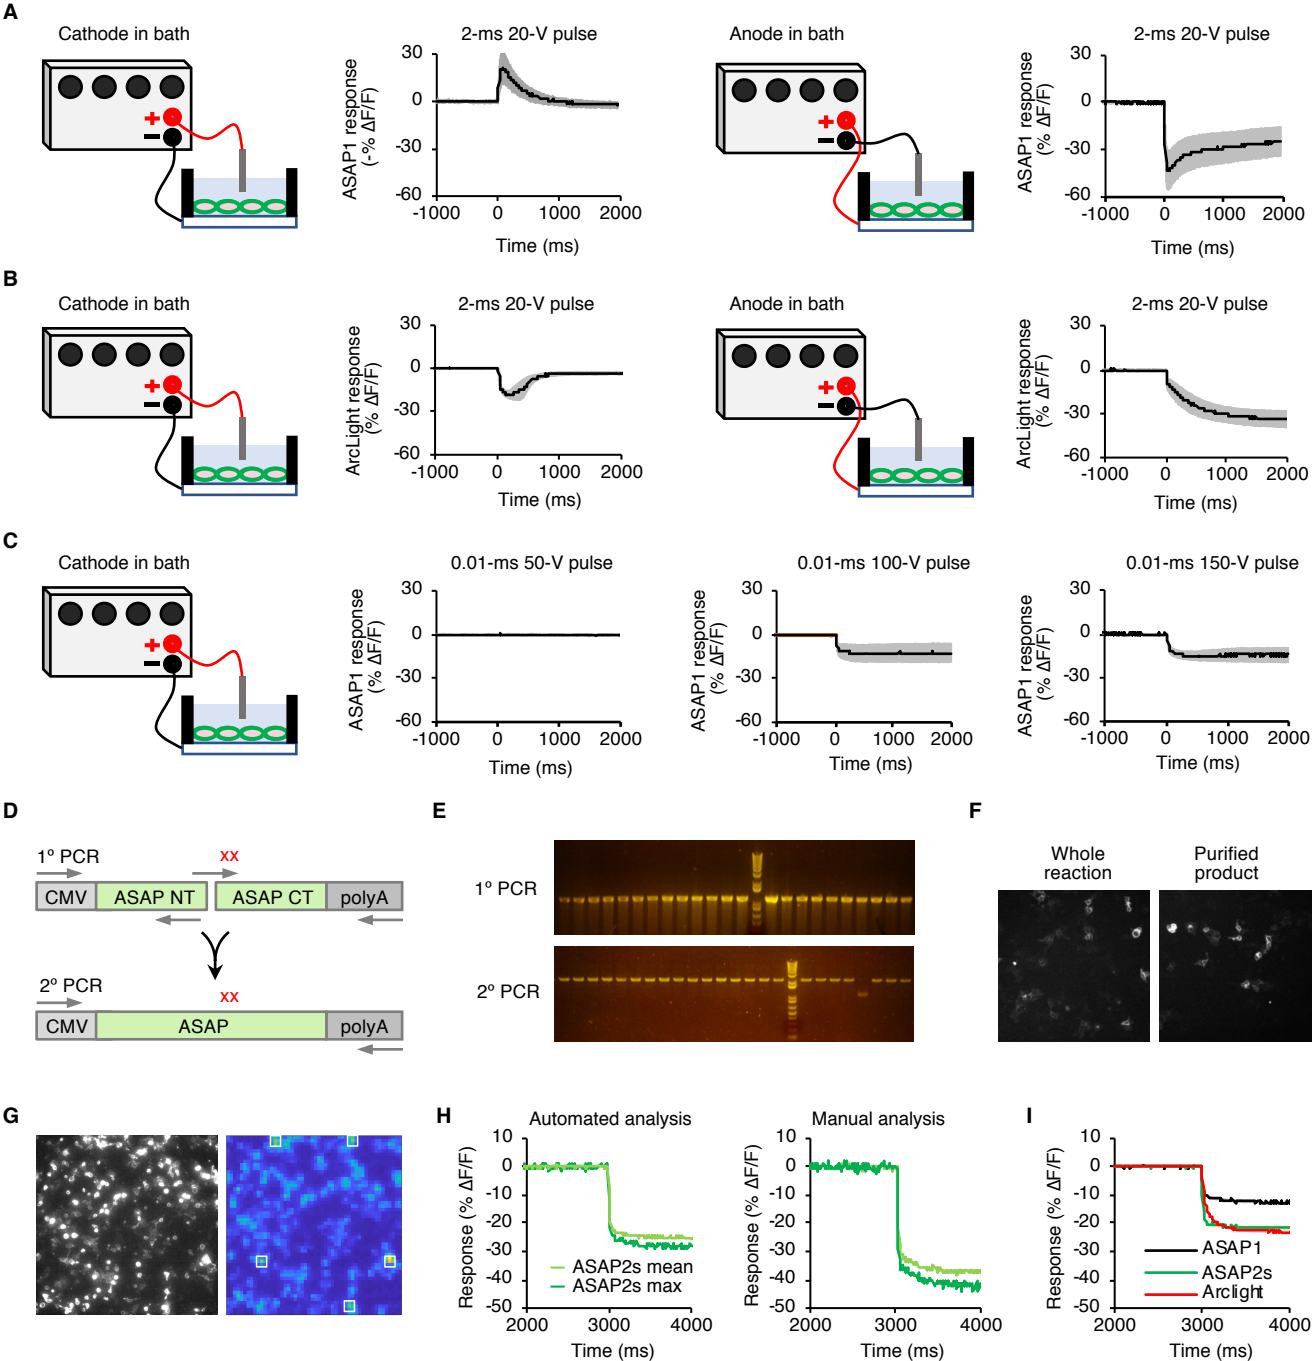

Supplement: NIHMS1545664-supplement-1.pdf [file NIHMS1545664-supplement-1.pdf]

**A**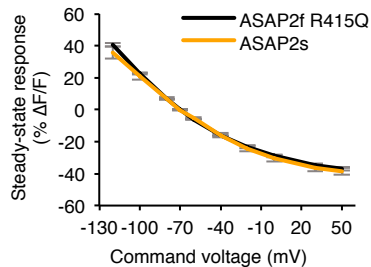**B**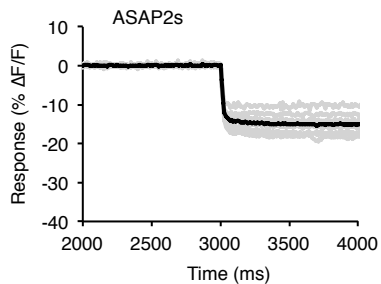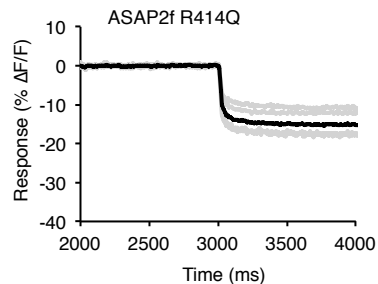**C**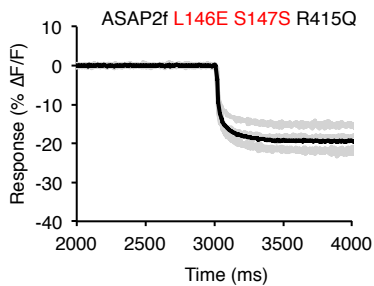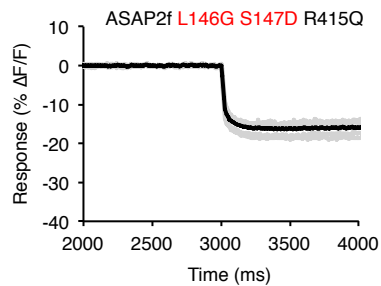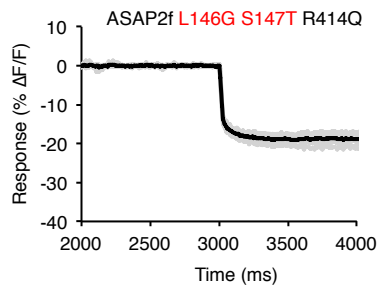**D**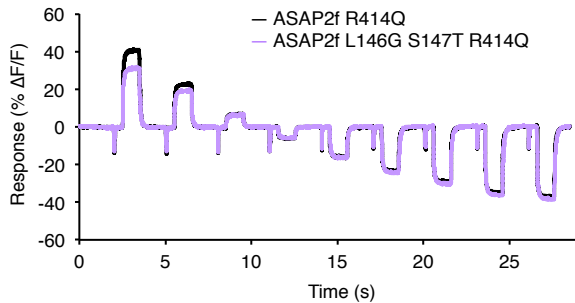**E**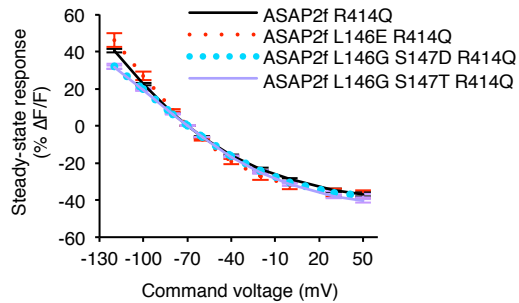

Supplement: NIHMS1545664-supplement-2.pdf [file NIHMS1545664-supplement-2.pdf]

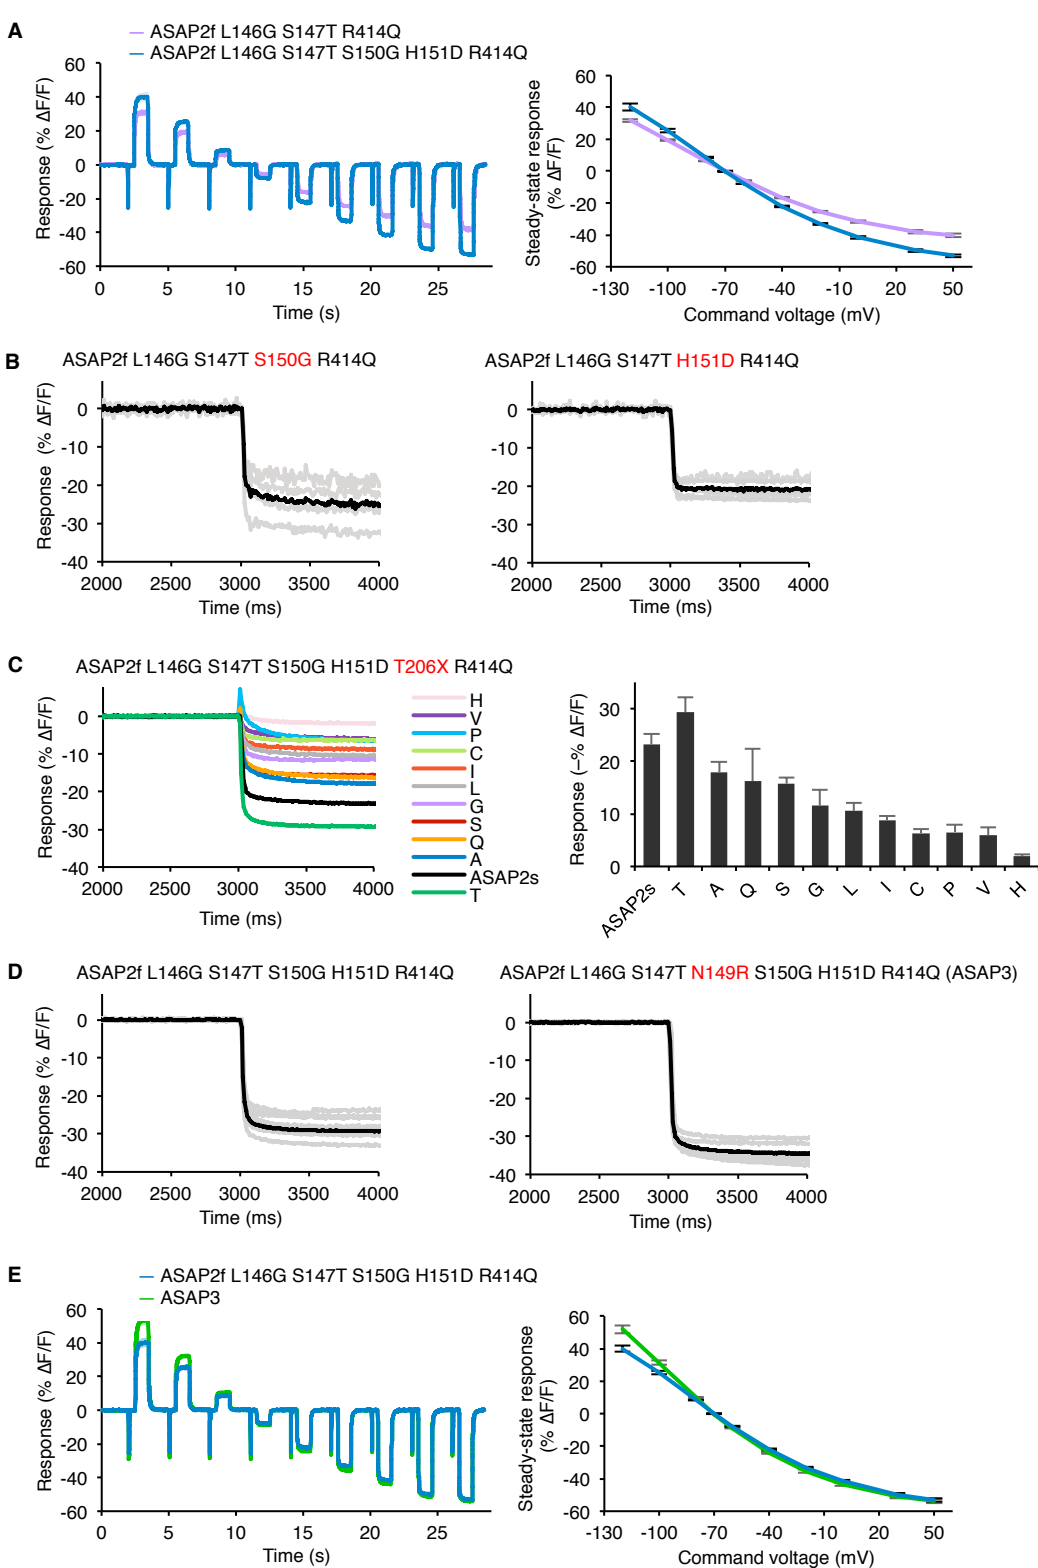

Supplement: NIHMS1545664-supplement-4.pdf [file NIHMS1545664-supplement-4.pdf]

**A**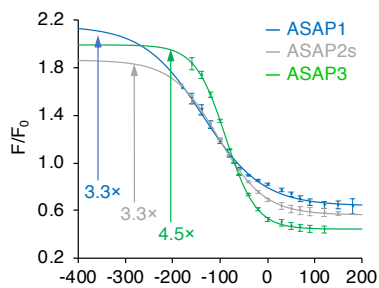**B**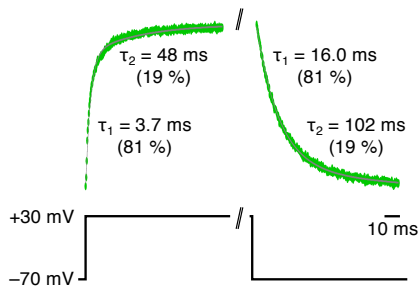**C**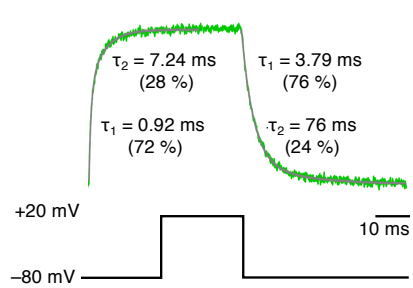**D**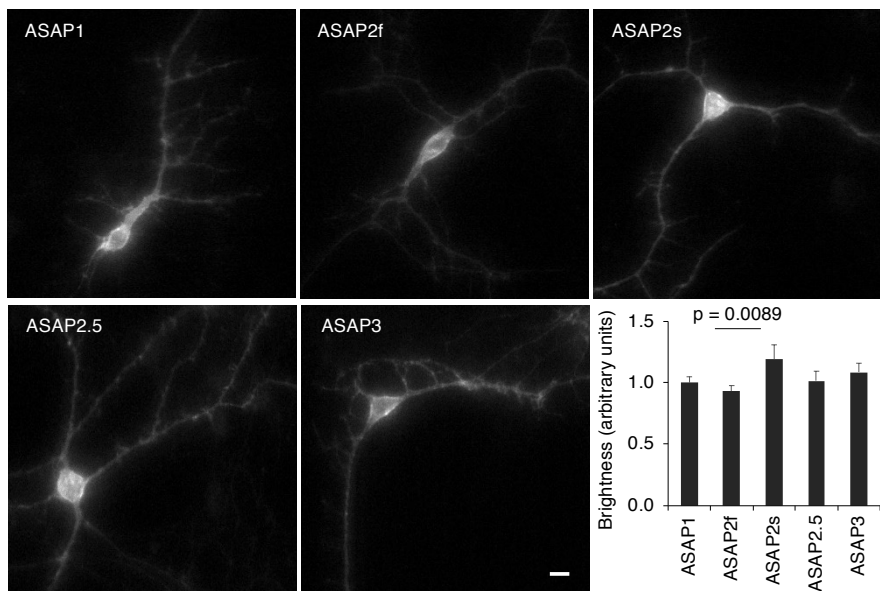**E**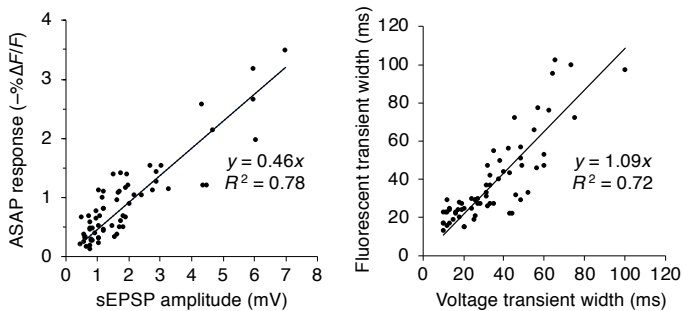

Supplement: NIHMS1545664-supplement-5.pdf [file NIHMS1545664-supplement-5.pdf]

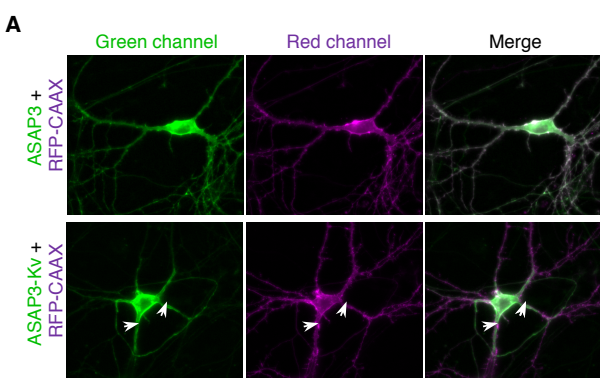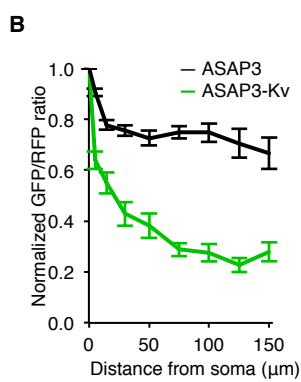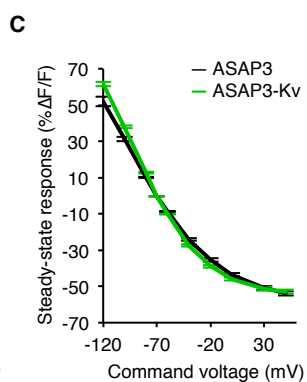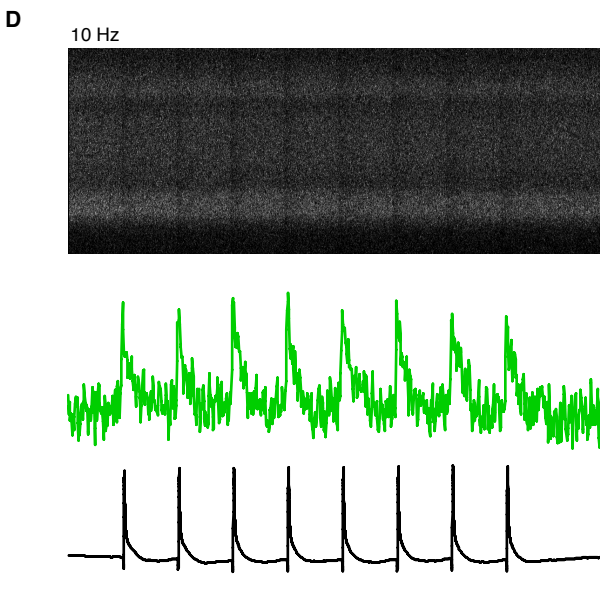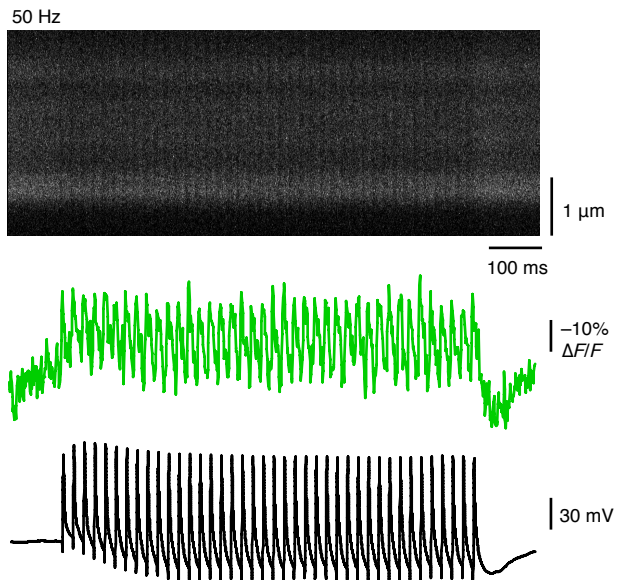

Supplement: NIHMS1545664-supplement-6.pdf [file NIHMS1545664-supplement-6.pdf]

**A**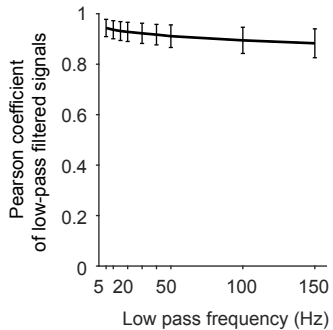**B**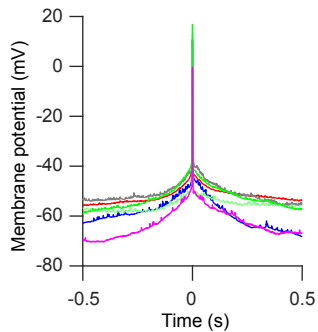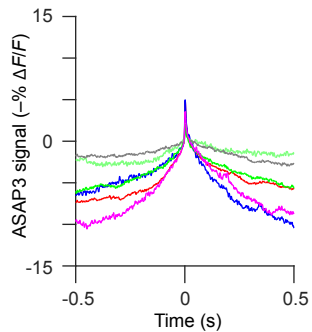

Supplement: NIHMS1545664-supplement-7.pdf [file NIHMS1545664-supplement-7.pdf]

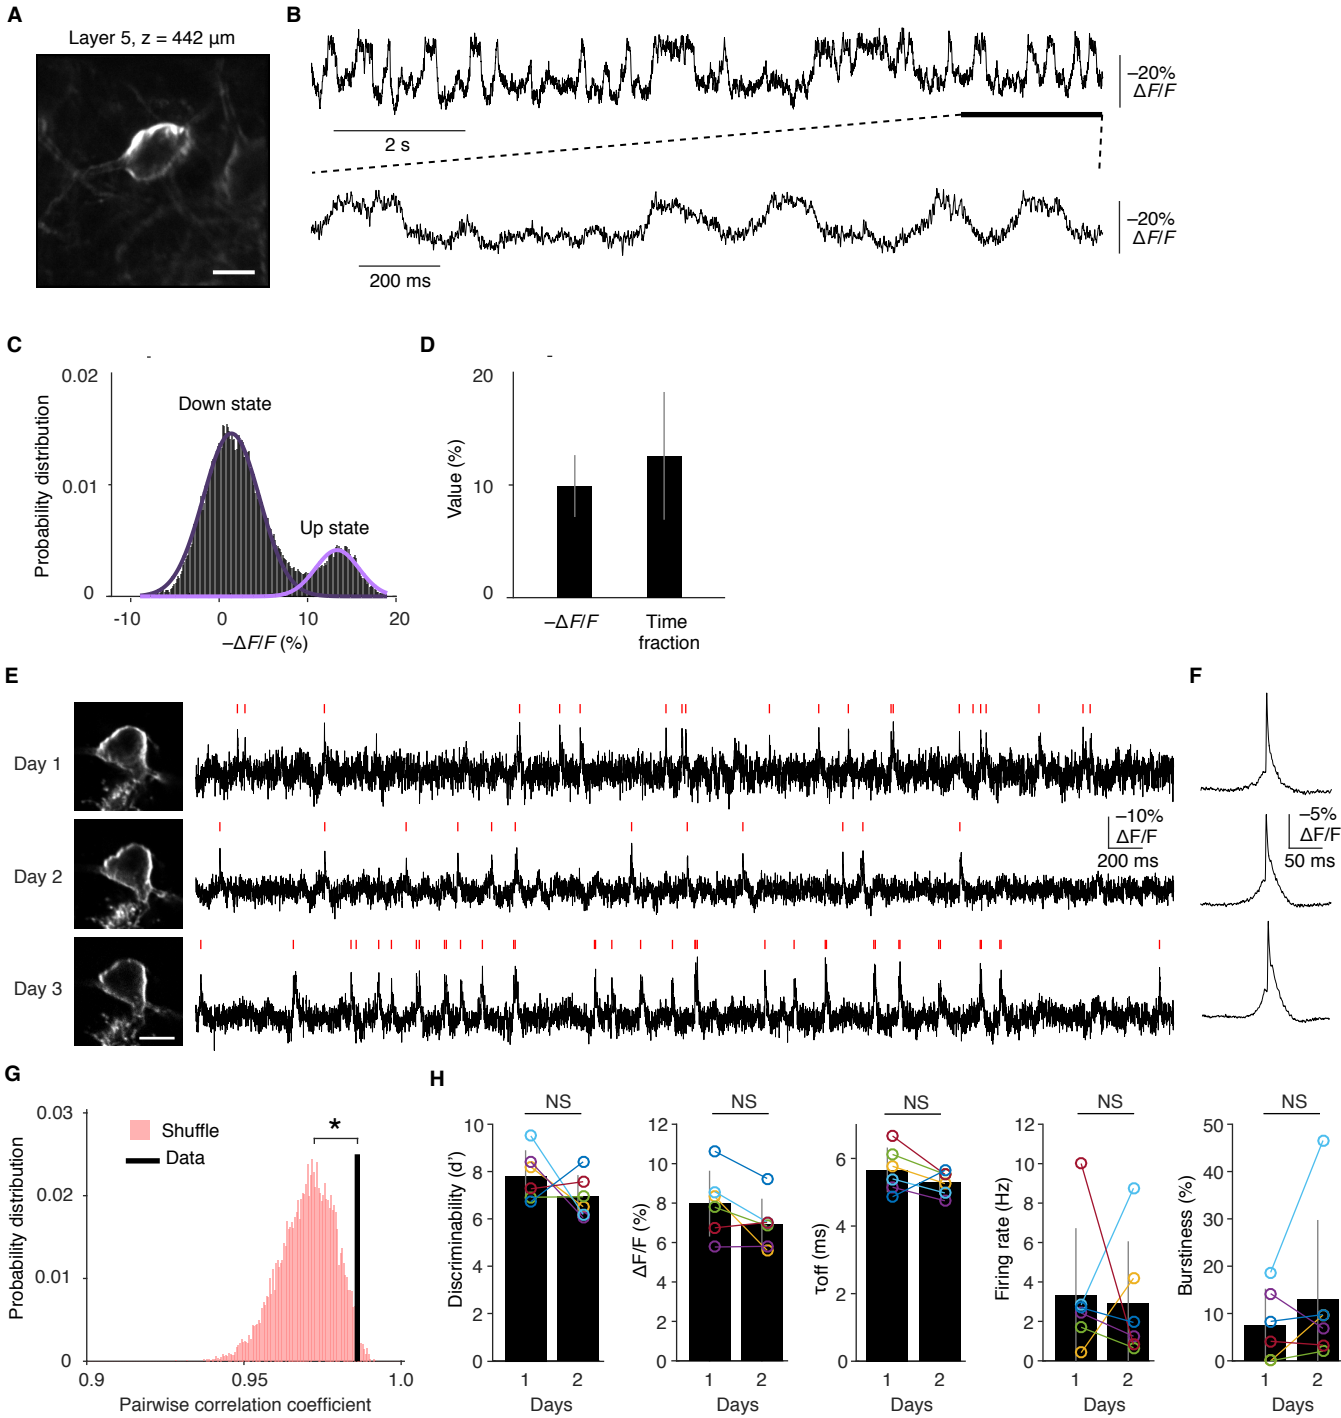

Supplement: NIHMS1545664-supplement-8.pdf [file NIHMS1545664-supplement-8.pdf]

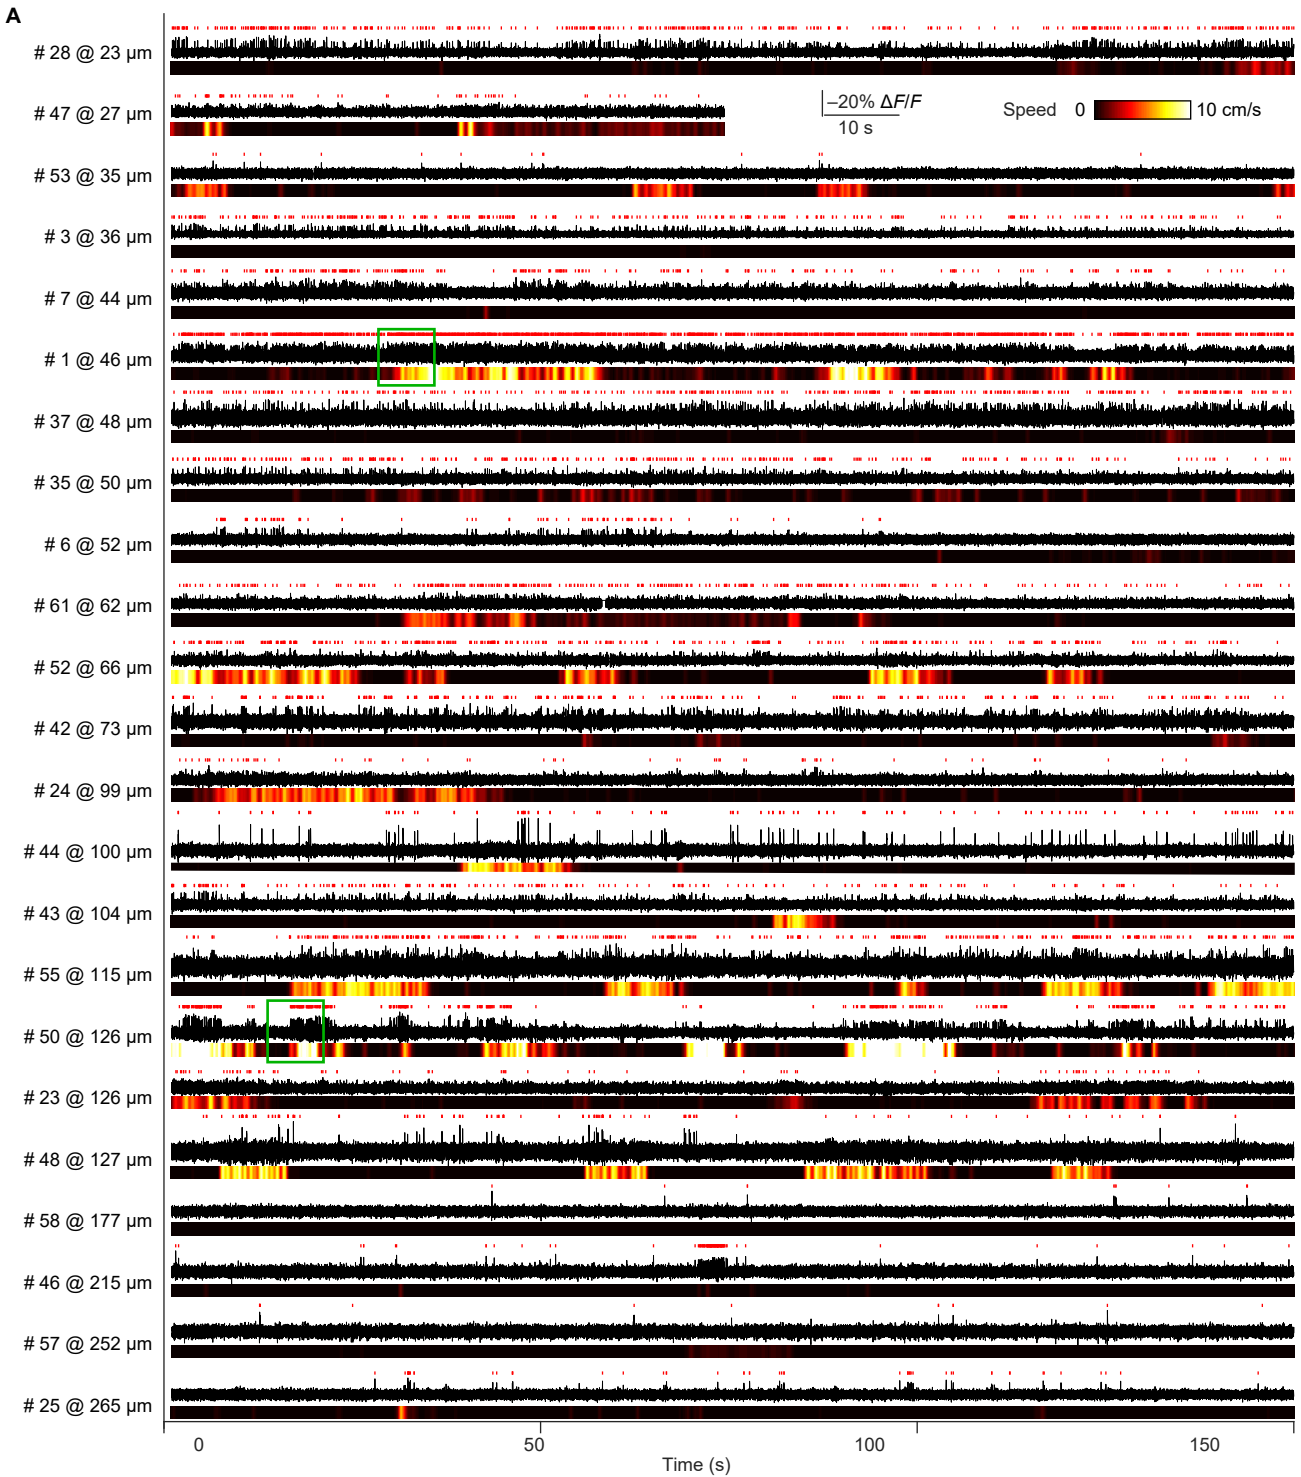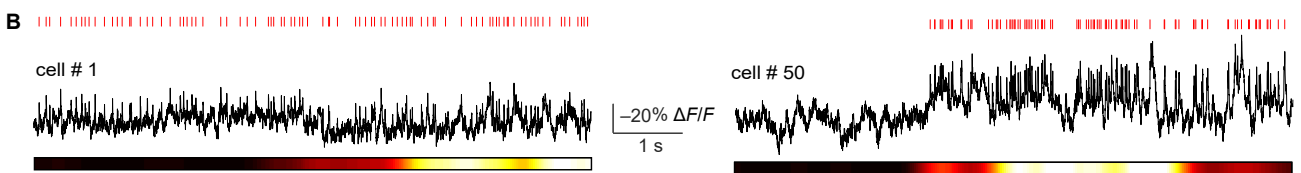

Supplement: NIHMS1545664-supplement-9.pdf [file NIHMS1545664-supplement-9.pdf]
